# Supplementary material
Source: PubMed Central journal article supplement (PMC7406252)
Supplement: jciinsight-5-136007-s085.pdf [file jciinsight-5-136007-s085.pdf]

1 **Supplementary Materials**

2 **Figure S1.**

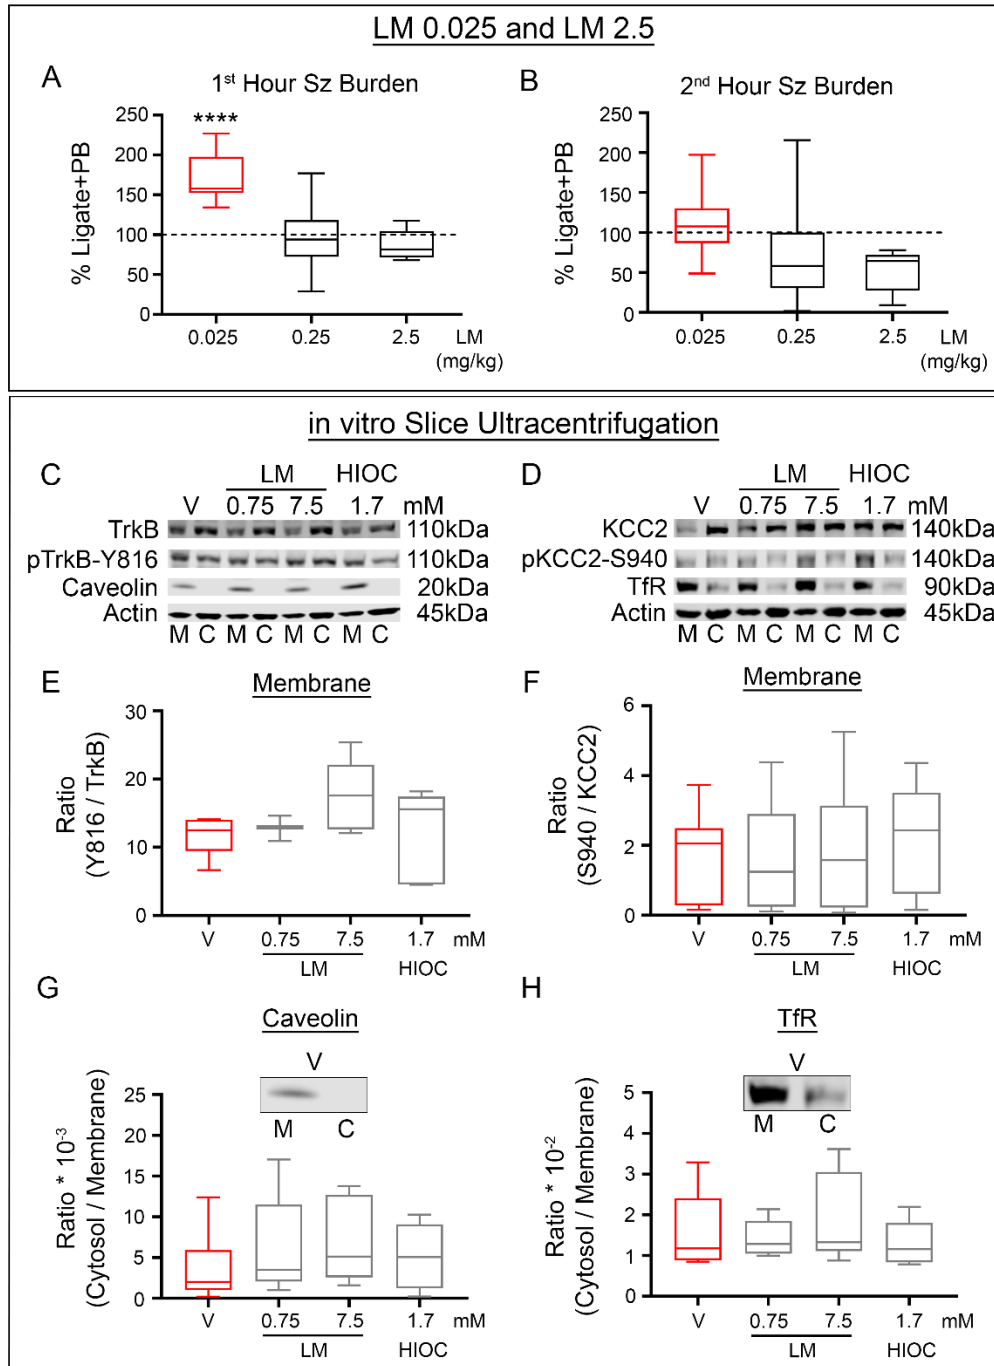

3

4 **Figure S1. Effect of LM graded doses on EEG seizure burdens as compared to effective**

5 **ASM dose and quantification of in vitro TrkB phosphorylation in naïve P7 brain slices. (A)**

6 1<sup>st</sup> hour EEG seizure burden as percent Ligate+PB for Post LM0.025, Post LM0.25, and Post  
7 LM2.5 treated P7 pups. \*\*\*\* p<0.001 (Post LM0.025 vs. Ligate+PB) by one-way ANOVA.  
8 Number of mice (EEG): n = 28[16/12] (Ligate+PB [m/f]), 8[4/4] (Post LM0.025), 26[14/12]  
9 (Post LM), 8[4/4] (Post LM2.5). **(B)** 2<sup>nd</sup> hour EEG seizure burden as percent Ligate+PB for Post  
10 LM0.025, Post LM0.25, and Post LM2.5 treated P7 pups. **(C)** Representative Western blots  
11 showing membrane and cytosolic TrkB and pTrkB-Y816 expression after incubation with TrkB  
12 agonists. Plasma membrane fraction is denoted with an M, and proteins of interest were  
13 normalized to the membrane reference protein caveolin. Cytosolic fraction is denoted with a C,  
14 and proteins of interest were normalized to housekeeping protein  $\beta$ -actin. Number of mice and  
15 slices (WB): n = 2[4] (Vehicle [slices]), 2[4] (0.75mM LM), 2[4] (7.5mM LM), 2[4] (1.7mM  
16 HIOC). **(D)** Representative Western blots showing membrane and cytosolic KCC2 and pKCC2-  
17 S940 expression after incubation with TrkB agonists. **(E)** Ratio of pTrkB-Y816 to total TrkB at  
18 the plasma membrane. **(F)** Ratio of pKCC2-S940 to total KCC2 at the plasma membrane. **(G)**  
19 Ratio of caveolin-1 and **(H)** transferrin receptor fluorescence in the cytosolic fractions versus the  
20 membrane. All treatment groups showed similar expression levels, with membrane fraction  
21 fluorescence 2-3 orders of magnitude greater than the cytosolic fraction. Box-and-whisker plots  
22 show quartiles with median, and minima and maxima at the bottom and top whiskers  
23 respectively.

24

25

26

27

28

29 **Figure S2.**

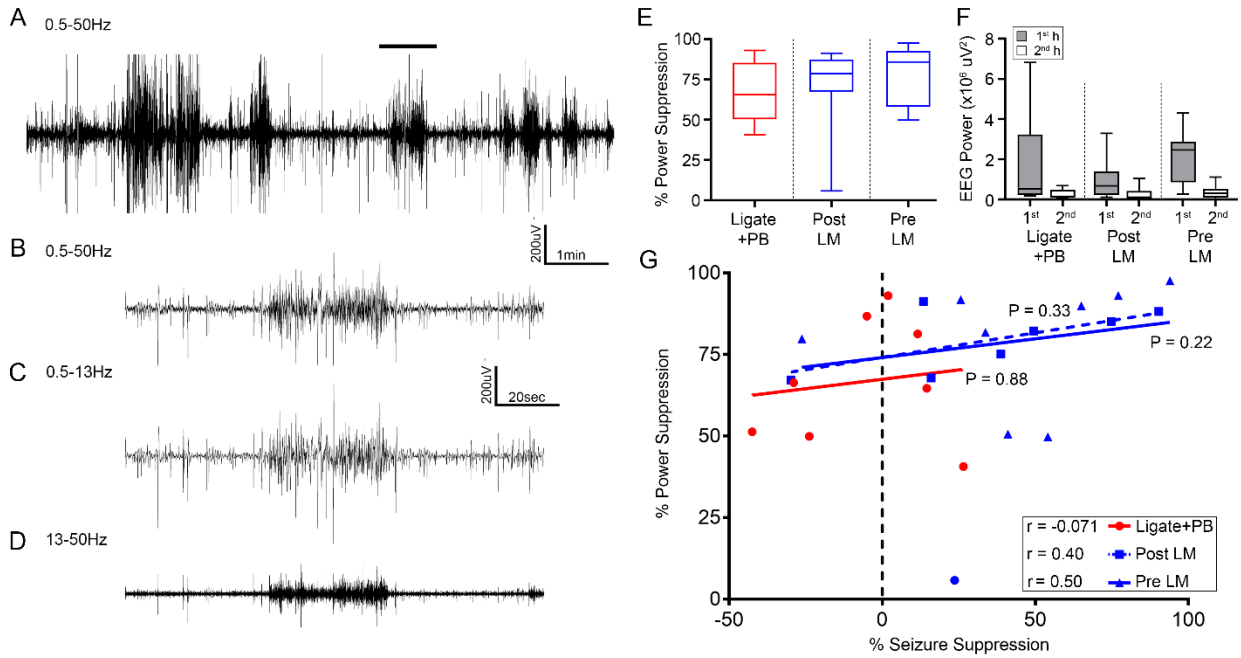

30

31 **Figure S2. EEG power alone failed to identify the LM-mediated rescue of PB-**  
 32 **refractoriness in P7 pups.** (A) Representative raw 10 min EEG trace from 0.5-50Hz of  
 33 refractory ischemic seizures from a neonatal P7 mouse pup. (B) A single ictal event from A  
 34 (solid bar – 2 min expanded timescale raw trace). (C and D) Filtered EEG trace of the same ictal  
 35 event in B filtered to show low frequency and high frequency components of the same ictal event  
 36 (0.5-13Hz and 13-50Hz). (E) EEG percent power suppression for Ligate+PB, Post LM, and Pre  
 37 LM treated P7 pups. Number of mice: n = 28 (Ligate+PB), 26 (Post LM), 27 (Pre LM). (F) EEG  
 38 1<sup>st</sup> and 2<sup>nd</sup> hour EEG powers for Ligate+PB, Post LM, and Pre LM treated P7 pups. (G) Percent  
 39 power suppression plotted as a function of percent seizure suppression. Post-hoc comparisons  
 40 were performed using Spearman’s two-tailed nonparametric test. Box-and-whisker plots show  
 41 quartiles with median, and minima and maxima at the bottom and top whiskers respectively.

42

43

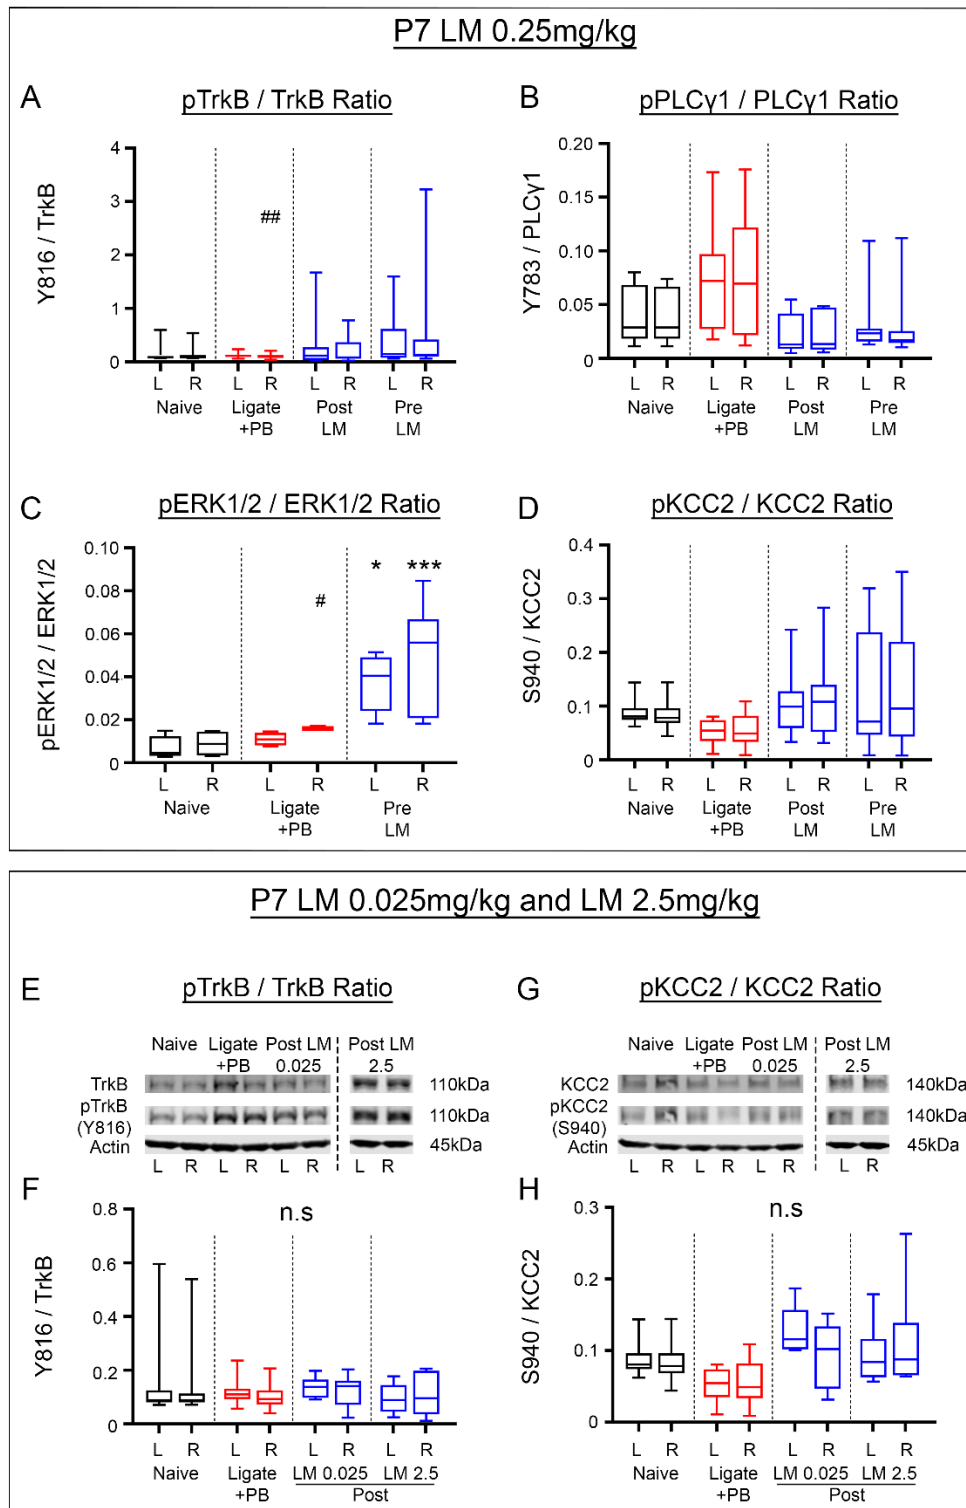

46 **Figure S3. Normalization of phospho-proteins to their total proteins in P7 ischemic pups.**

47 **(A)** pTrkB-Y816 normalized to total TrkB for Naïve, Ligate+PB, Post LM, and Pre LM at P7. #  
48 signified hemispheric differences within groups, ##  $p < 0.01$  by two-tailed  $t$  test. Number of mice:  
49  $n = 13$  (Naïve), 19 (Ligate+PB), 13 (Post LM), 22 (Pre LM). **(B)** pPLC $\gamma$ 1-Y783 normalized to  
50 total PLC $\gamma$ 1 for Naïve, Ligate+PB, Post LM, and Pre LM at P7. **(C)** pERK1/2 normalized to total  
51 ERK1/2 for Naïve, Ligate+PB, and Pre LM at P7. \*  $p < 0.05$ , \*\*\*  $p < 0.001$  by one-way ANOVA.  
52 #  $p < 0.05$  by two-tailed  $t$  test. **(D)** pKCC2-S940 normalized to total KCC2 for Naïve, Ligate+PB,  
53 Post LM, and Pre LM at P7. **(E)** Representative Western blots showing contralateral (L) and  
54 ipsilateral (R) TrkB and pTrkB-Y816 expression in P7 pups treated with lower and higher graded  
55 doses of LM (LM0.025 and LM2.5 respectively). All proteins of interest were normalized to  
56 housekeeping protein  $\beta$ -actin.  $n = 13$  (Naïve), 19 (Ligate+PB), 8 (Post LM 0.025), 13 (Post LM).  
57 **(F)** pTrkB-Y816 normalized to total TrkB for Naïve, Ligate+PB, Post LM0.025, and Post  
58 LM2.5. **(G)** Representative Western blots showing contralateral (L) and ipsilateral (R) KCC2  
59 and pKCC2-S940 expression in P7 pups treated with graded doses of LM. All proteins of interest  
60 were normalized to housekeeping protein  $\beta$ -actin. **(H)** pKCC2-S940 normalized to total KCC2  
61 for Naïve, Ligate+PB, Post LM0.025, and Post LM2.5. Box-and-whisker plots show quartiles  
62 with median, and minima and maxima at the bottom and top whiskers respectively.

63

64

65

66

67

68

69 **Figure S4.**

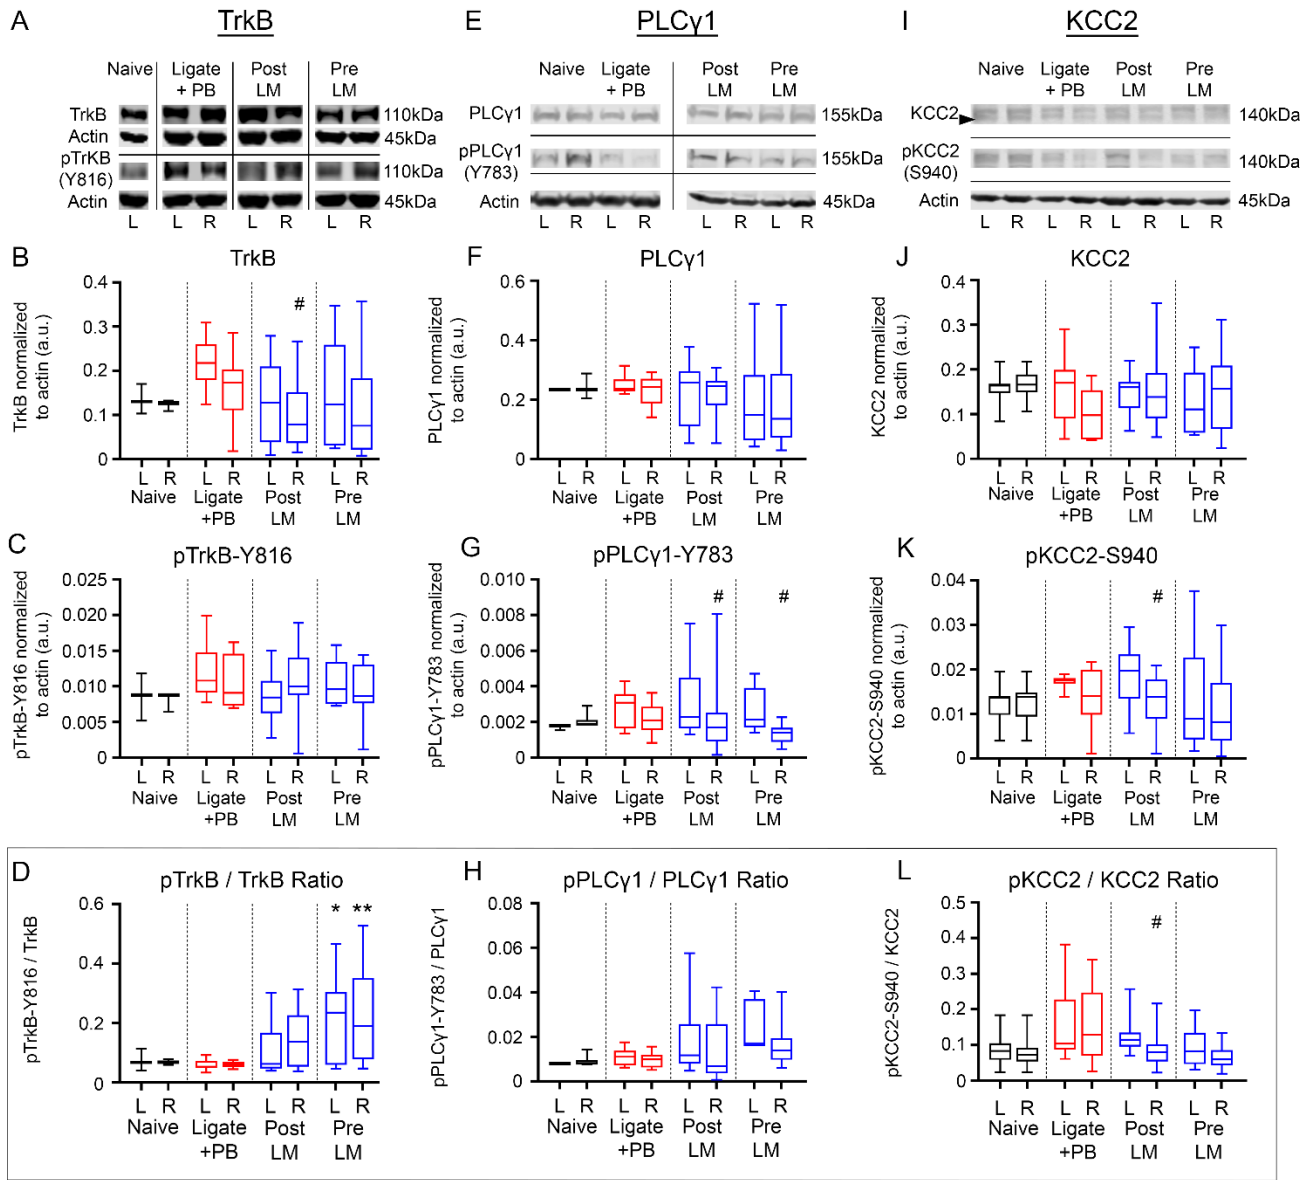

70

71 **Figure S4. TrkB-pathway activation was not significant in P10 ischemic pups.** All proteins

72 of interest were normalized to housekeeping protein  $\beta$ -actin. (A) Representative Western blots

73 showing TrkB and pTrkB-Y816 expression in P10 pups. Number of mice: n = 4 (Naive), 9

74 (Ligate+PB), 12 (Post LM), 11 (Pre LM). (B) Contralateral (L) and ipsilateral (R) TrkB

75 expression 24h after ischemic insult for all treatment groups. # signified hemispheric differences

76 within groups. # p<0.05 by two-tailed *t* test. (C) Contralateral (L) and ipsilateral (R) pTrkB-

77 Y816 expression 24h after ischemic insult for all treatment groups. **(D)** pTrkB-Y816 normalized  
78 to total TrkB for Naïve, Ligate+PB, Post LM, and Pre LM at P10. \*  $p < 0.05$ , \*\*  $p < 0.01$  by one-  
79 way ANOVA. **(E)** Representative Western blots showing PLC $\gamma$ 1 and pPLC $\gamma$ 1-Y783 expression.  
80 **(F)** Contralateral (L) and ipsilateral (R) PLC $\gamma$ 1 expression 24h after ischemic insult for all  
81 treatment groups. **(G)** Contralateral (L) and ipsilateral (R) pPLC $\gamma$ 1-Y783 expression 24h after  
82 ischemic insult for all treatment groups. # signified hemispheric differences within groups. #  
83  $p < 0.05$  by two-tailed  $t$  test. **(H)** pPLC $\gamma$ 1-Y783 normalized to total PLC $\gamma$ 1 for Naïve, Ligate+PB,  
84 Post LM, and Pre LM at P10. **(I)** Representative Western blots showing KCC2 and pKCC2-S940  
85 expression. **(J)** Contralateral (L) and ipsilateral (R) KCC2 expression 24h after ischemic insult  
86 for all treatment groups. **(K)** Contralateral (L) and ipsilateral (R) pKCC2-S940 expression 24h  
87 after ischemic insult for all treatment groups. #  $p < 0.05$  by two-tailed  $t$  test. **(L)** KCC2 normalized  
88 to total pKCC2-S940 for Naïve, Ligate+PB, Post LM, and Pre LM at P10. # signified  
89 hemispheric differences within groups. #  $p < 0.05$ . Box-and-whisker plots show quartiles with  
90 median, and minima and maxima at the bottom and top whiskers respectively.

91

92

93

94

95

96

97

98

99

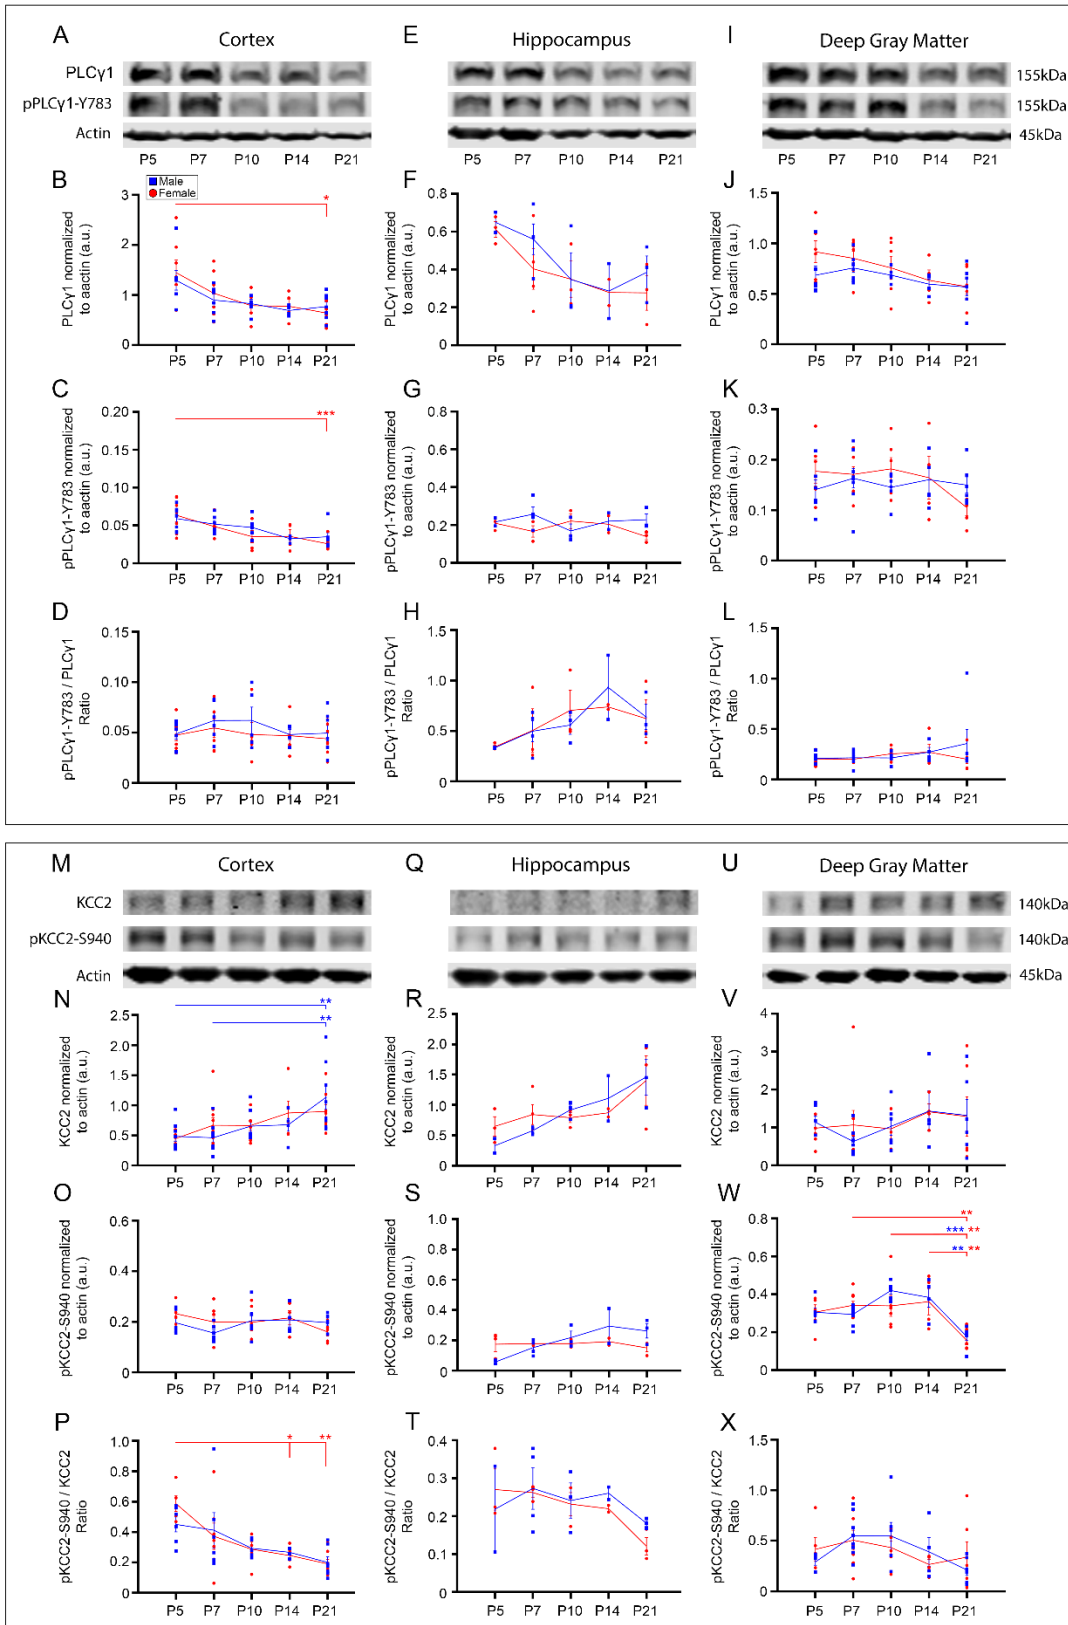



102 **Figure. S5. PLC $\gamma$ 1 and pPLC $\gamma$ 1-Y783 expression decreased significantly in female cortices,**  
103 **whereas KCC2 expression significantly increased in male cortices.** All proteins were  
104 normalized to  $\beta$ -actin. **(A)** Representative Western blots showing PLC $\gamma$ 1 and pPLC $\gamma$ 1-Y783  
105 expression in cortical tissue. **(B)** PLC $\gamma$ 1 and **(C)** pPLC $\gamma$ 1-Y783 expression in cortical tissue from  
106 P5 to P21. \*  $p < 0.05$ , \*\*\*  $p < 0.001$ , \*\*\*\*  $p < 0.0001$  by two-way ANOVA. **(D)** pPLC $\gamma$ 1-Y783  
107 normalized to total PLC $\gamma$ 1 in cortical tissue from P5 to P21. **(E)** Representative Western blots  
108 showing PLC $\gamma$ 1 and pPLC $\gamma$ 1-Y783 expression in hippocampal tissue. **(F)** PLC $\gamma$ 1 and **(G)**  
109 pPLC $\gamma$ 1-Y783 expression in hippocampal tissue from P5 to P21. **(H)** pPLC $\gamma$ 1-Y783 normalized  
110 to total PLC $\gamma$ 1 in hippocampal tissue from P5 to P21. **(I)** Representative Western blots showing  
111 PLC $\gamma$ 1 and pPLC $\gamma$ 1-Y783 expression in deep gray matter. **(J)** PLC $\gamma$ 1 and **(K)** pPLC $\gamma$ 1-Y783  
112 expression in deep gray matter from P5 to P21. **(L)** pPLC $\gamma$ 1-Y783 normalized to total PLC $\gamma$ 1 in  
113 hippocampal tissue from P5 to P21. **(M)** Representative Western blots showing KCC2 and  
114 pKCC2-S940 expression in cortical tissue. **(N)** KCC2 and **(O)** pKCC2-S940 expression in  
115 cortical tissue from P5 to P21. \*\*  $p < 0.01$  by two-way ANOVA. **(P)** pKCC2-S940 normalized to  
116 total KCC2 in cortical tissue from P5 to P21. \*  $p < 0.05$ , \*\*  $p < 0.01$  by two-way ANOVA. **(Q)**  
117 Representative Western blots showing KCC2 and pKCC2-S940 expression in hippocampal  
118 tissue. **(R)** KCC2 and **(S)** pKCC2-S940 expression in cortical tissue from P5 to P21. **(T)** pKCC2-  
119 S940 normalized to total KCC2 in hippocampal tissue from P5 to P21. **(U)** Representative  
120 Western blots showing KCC2 and pKCC2-S940 expression in deep gray matter. **(V)** KCC2 and  
121 **(W)** pKCC2-S940 expression in deep gray matter from P5 to P21. \*\*  $p < 0.01$ , \*\*\*  $p < 0.001$  by  
122 two-way ANOVA. **(X)** pKCC2-S940 normalized to total KCC2 in deep gray matter from P5 to  
123 P21. Number of mice per age group and region:  $n \geq 4$ [2/2] (cortex [m/f]),  $\geq 3$ [1/2] (hippocampus

124 [m/f]),  $\geq 4[2/2]$  (deep gray matter [m/f]). Dot plots show all data and the mean  $\pm 1$  standard error  
125 of the mean (SEM). Red (female) and blue (male) lines connect the means across age groups.

126

127

128

129

130

131

132

133

134

135

136

137

138

139

140

141

142

143

144

145

146

147 Table S1. Sample sizes for experimental paradigms

148

| Sample size of pups in post-ligation EEG recordings                                   |                            |                |                               |                |
|---------------------------------------------------------------------------------------|----------------------------|----------------|-------------------------------|----------------|
| Pups                                                                                  | Ligate+PB                  | Post LM 0.25   | Pre LM 0.25                   |                |
| P7 total (M/F) [litters]                                                              | 28 (16/12) [9]             | 26 (14/12) [6] | 27 (14/13) [9]                |                |
| P10 total (M/F) [litters]                                                             | 11 (6/5) [3]               | 13 (6/7) [3]   | 11 (5/6) [3]                  |                |
| Pups                                                                                  | Ligate+PB                  | Post LM 2.5    | Pre LM 2.5                    |                |
| P7 total (M/F) [litters]                                                              | 28 (16/12) [9]             | 8 (4/4) [2]    | 8 (4/4) [2]                   |                |
| Pups                                                                                  | Ligate+PB                  | Post LM 0.025  |                               |                |
| P7 total (M/F) [litters]                                                              | 28 (16/12) [9]             | 8 (4/4) [1]    |                               |                |
| Pups                                                                                  | Ligate+PB                  | Post HIOC      | Pre HIOC                      |                |
| P7 total (M/F) [litters]                                                              | 28(16/12) [9]              | 6 (3/3) [2]    | 8 (4/4) [2]                   |                |
| Pups                                                                                  | Ligate+PB                  | Post DG        | Pre DG                        |                |
| P7 total (M/F) [litters]                                                              | 28 (16/12) [9]             | 16 (8/8) [2]   | 15 (10/5) [2]                 |                |
| Sample size of pups that underwent Western Blot analysis after EEG recordings         |                            |                |                               |                |
| Pups                                                                                  | Naïve                      | Ligate+PB      | Post LM 0.25                  | Pre LM 0.25    |
| P7 total (M/F) [litters]                                                              | 13 (6/7) [9]               | 19 (10/9) [7]  | 13 (5/8) [6]                  | 22 (11/11) [9] |
| P10 total (M/F) [litters]                                                             | 4 (2/2) [3]                | 9 (5/4) [3]    | 12 (6/6) [3]                  | 11 (5/6) [3]   |
| Pups                                                                                  | Naïve                      | Ligate+PB      | Post LM2.5                    | Pre LM2.5      |
| P7 total (M/F) [litters]                                                              | 13 (6/7) [9]               | 19 (10/9) [7]  | 8 (4/4) [2]                   | 8 (4/4) [2]    |
| Pups                                                                                  | Naïve                      | Ligate+PB      | Post LM 0.025                 |                |
| P7 total (M/F) [litters]                                                              | 13 (6/7) [9]               | 19 (10/9) [7]  | 8 (4/4) [1]                   |                |
| Pups                                                                                  | Naïve                      | Ligate+PB      | Post HIOC                     | Pre HIOC       |
| P7 total (M/F) [litters]                                                              | 13 (6/7) [9]               | 19 (10/9) [7]  | 5 (3/2) [2]                   | 6 (4/2) [2]    |
| Pups                                                                                  | Naïve                      | Ligate+PB      | Post DG                       | Pre DG         |
| P7 total (M/F) [litters]                                                              | 13 (6/7) [9]               | 19 (10/9) [7]  | 6 (4/2) [2]                   | 7 (4/3) [2]    |
| Sample size of pups that underwent Western Blot analysis in Developmental Series      |                            |                |                               |                |
| Pups                                                                                  | Cortex                     | Hippocampus    | Deep Gray Matter              |                |
| P5 total (M/F) [litters]                                                              | 4 (2/2) [3]                | 3 (1/2) [3]    | 4 (2/2) [3]                   |                |
| P7 total (M/F) [litters]                                                              | 4 (2/2) [3]                | 6 (3/3) [3]    | 6 (3/3) [3]                   |                |
| P10 total (M/F) [litters]                                                             | 4 (2/2) [3]                | 4 (2/2) [3]    | 4 (2/2) [3]                   |                |
| P14 total (M/F) [litters]                                                             | 4 (2/2) [3]                | 4 (2/2) [3]    | 4 (2/2) [3]                   |                |
| P21 total(M/F) [litters]                                                              | 4 (2/2) [3]                | 4 (2/2) [3]    | 4 (2/2) [3]                   |                |
| Sample size of pups that underwent in vitro drug incubation and Western Blot analysis |                            |                |                               |                |
| Pups                                                                                  | 0.75mM LM                  | 7.5mM LM       | 1.7mM HIOC                    |                |
| P7 total (M/F) [litters]                                                              | 2 (1/1) [1]                | 2 (1/1) [1]    | 2 (1/1) [1]                   |                |
| Sample size of pups from TrkB <sup>F616A</sup> litters                                |                            |                |                               |                |
| Pups                                                                                  | WT <sup>-/-</sup> + 1NMPP1 |                | F616A <sup>+/+</sup> + 1NMPP1 |                |
| P7 total (M/F) [litters]                                                              | 18 (9/9) [5]               |                | 10 (6/4) [5]                  |                |

149

150 **Table S2. Drugs, antibodies, and mice information**

151

| <b>Antibody</b>                                               | <b>Dilution</b> | <b>Vendor</b>                         | <b>RRID</b> |
|---------------------------------------------------------------|-----------------|---------------------------------------|-------------|
| CD-1 Mouse                                                    | N/A             | Charles River                         | 022         |
| C57 Black <i>TrkB</i> <sup>F616A</sup> Mouse                  | N/A             | The Jackson Laboratory                | 022363      |
| Phenobarbital (PB)                                            | N/A             | MilliporeSigma<br>P5178-25G           | 57-30-7     |
| LM22A-4                                                       | N/A             | Tocris                                | 4607        |
| HIOC                                                          | N/A             | Tocris                                | 5961        |
| Deoxygedunin (DG)                                             | N/A             | Gaia Chemical Company                 | L4250       |
| 1NMPP1                                                        | N/A             | Apex Bio                              | B1299       |
| mouse $\alpha$ KCC2                                           | 1:1000          | Aviva Systems Biology<br>OASE00240    | AB_2721238  |
| rabbit $\alpha$ pKCC2-S940                                    | 1:1000          | Aviva Systems Biology<br>OAPC00188    | AB_2721198  |
| mouse $\alpha$ TrkB                                           | 1:1000          | BD Biosciences 610102                 | AB_397508   |
| rabbit $\alpha$ pTrkB-Y816                                    | 1:500           | Millipore ABN1381                     | AB_2721199  |
| mouse $\alpha$ PLC $\gamma$ 1                                 | 1:1000          | Thermo Fisher Scientific<br>LF-MA0050 | AB_2163544  |
| rabbit $\alpha$ pPLC $\gamma$ 1-Y783                          | 1:1000          | Cell Signaling Technology<br>2821S    | AB_330855   |
| rabbit $\alpha$ Erk1/2                                        | 1:1000          | Cell Signaling Technology<br>4695     | AB_390779   |
| rabbit $\alpha$ pErk1/2-Thr202/Tyr204                         | 1:1000          | Cell Signaling Technology<br>4377     | AB_331775   |
| mouse $\alpha$ actin                                          | 1:10000         | LI-COR Biosciences<br>926-42213       | AB_2637092  |
| mouse $\alpha$ Transferrin Receptor                           | 1:500           | ThermoFisher Scientific               | AB_2533029  |
| rabbit $\alpha$ Caveolin-1                                    | 1:1000          | Abcam                                 | AB_444314   |
| goat $\alpha$ mouse IgG, IRDye®<br>800CW Conjugated           | 1:5000          | LI-COR Biosciences<br>926-32210       | AB_621842   |
| goat $\alpha$ rabbit IgG Antibody,<br>IRDye® 680LT Conjugated | 1:5000          | LI-COR Biosciences<br>926-68021       | AB_10706309 |

152

153
